# Supplementary material
Source: PubMed Central journal article supplement (PMC3101114)
Supplement: NIHMS278851-supplement-1_si_001.pdf [file NIHMS278851-supplement-1_si_001.pdf]

Supporting information

# <sup>a</sup>Star-Comb Polymers and Their Doxorubicin Conjugates

*Bo Chen<sup>†#</sup>, Derek G. van der Poll<sup>‡</sup>, Katherine Jerger<sup>†</sup>, William C. Floyd<sup>‡</sup>, Jean M. J. Fréchet<sup>‡</sup> and  
Francis C. Szoka<sup>†\*</sup>*

<sup>†</sup> Department of Bioengineering, Therapeutic Sciences and Pharmaceutical Chemistry,  
University of California, San Francisco, California 94143-0912; and

<sup>‡</sup> Department of Chemistry, University of California, Berkeley, California 94720-1460

<sup>a</sup> Based on the classification, nomenclature, and structure representation described in L. Schultz and E. S. Wilks *J. Chem. Inf. Comput. Sci.* 1998, 38, 85-99, star-comb polymers comprises a dendritic core from which a number of comb arms emanate.

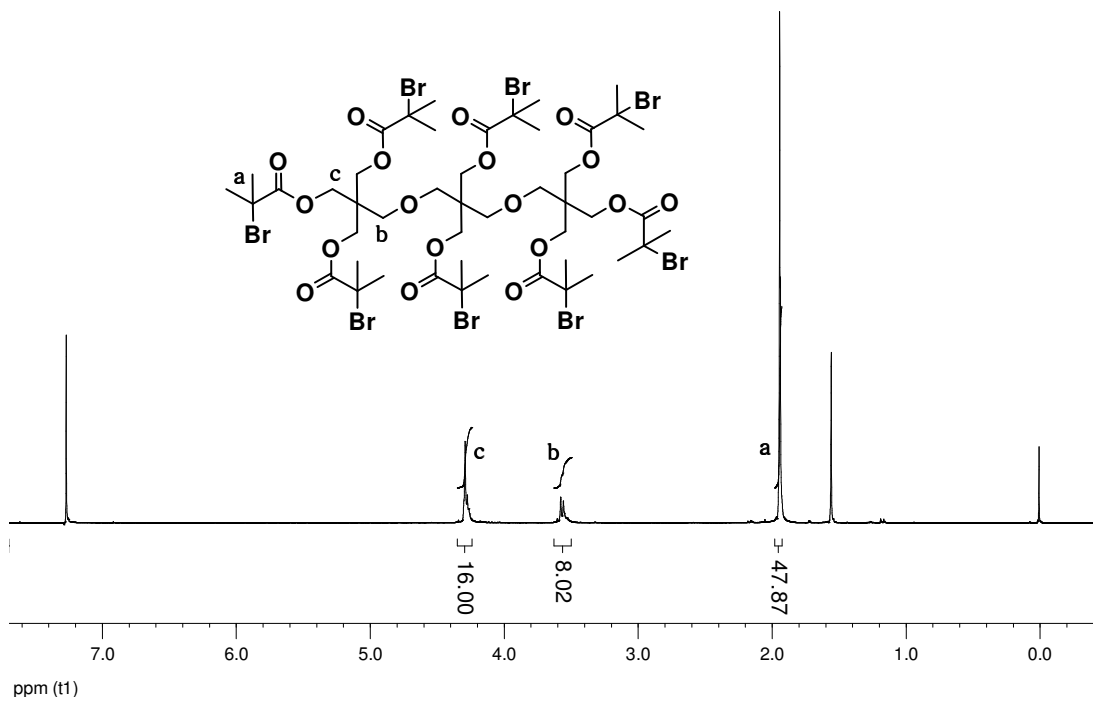

Figure S1. <sup>1</sup>H NMR spectrum of initiator 1 in *d*-chloroform.

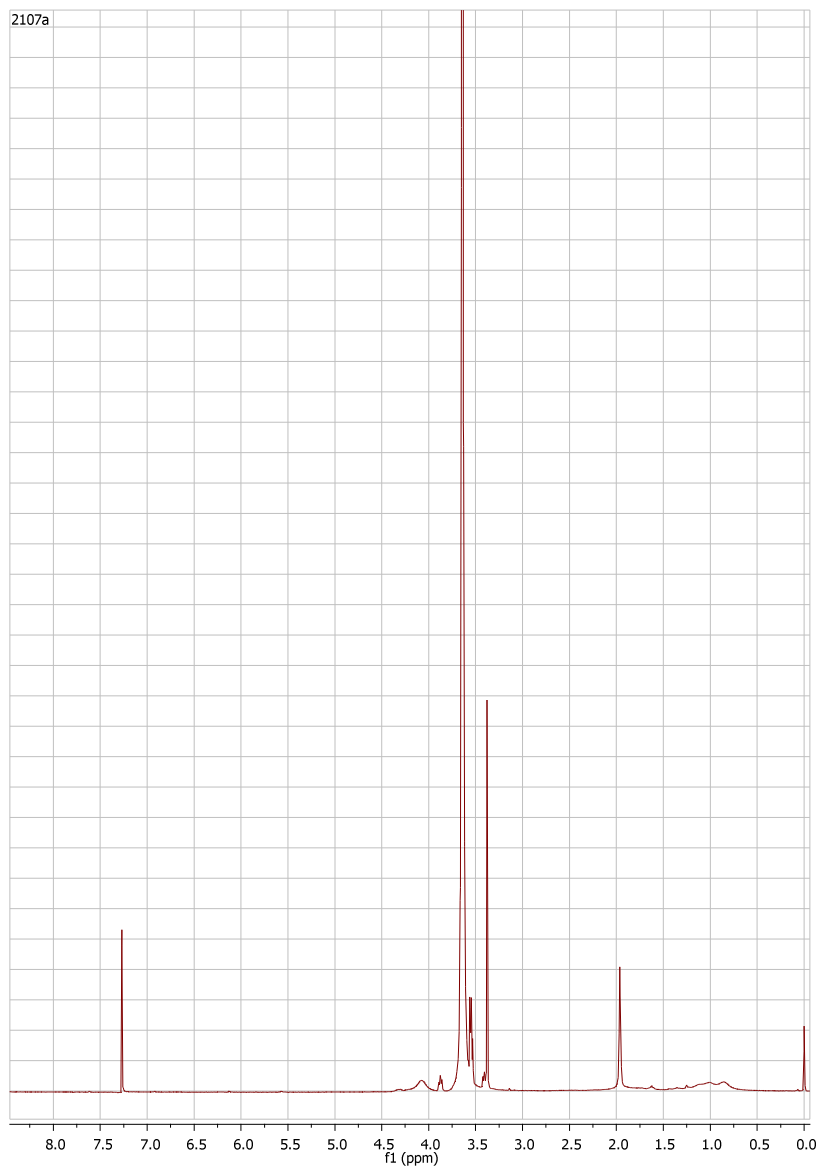

Figure S2. Representative  $^1\text{H}$  NMR spectrum of polymer 2 in  $\text{CDCl}_3$

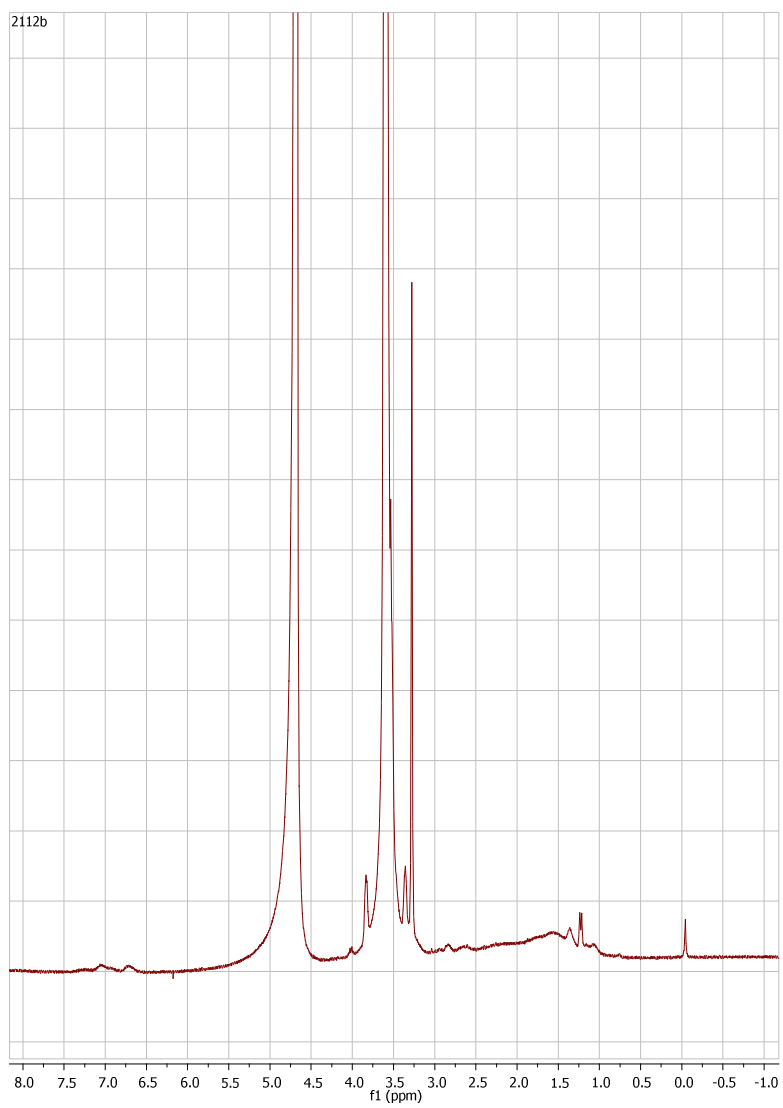

Figure S3. Representative  $^1\text{H}$  NMR spectrum of polymer 3 in  $\text{D}_2\text{O}$ .
